# Supplementary material for: Malignancy in giant cell tumor of bone in the extremities
Source: PubMed Central journal article supplement — J Bone Oncol. 2020 Nov 5;26:100334. doi: 10.1016/j.jbo.2020.100334 (PMC7680773; doi:10.1016/j.jbo.2020.100334), 2020-11-05
Supplement: mmc1.pdf [file mmc1.pdf]

**Beijing Jishuitan Hospital**

**Institutional Review Board Approval Form (IRB)**

This approval form must be included in all research papers and must be signed by the thesis investigator.

**Project Information:**

**Principal Investigator:** Xiao-hui NIU

**Department:** Department of Orthopaedic Oncology Surgery, Beijing Jishuitan Hospital

**Project Title:** What is the Result of Surgical Treatment for Extremity Malignancy in Giant Cell Tumor of Bone

**Description of Proposed Project:**

Malignancy in giant cell tumor of bone (MGCTB) is a rare tumor with debilitating consequences. Because of its unusual occurrence, little is known about the epidemiology and surgical treatment result of MGCTB. We retrospective analyzed 1309 extremity GCTB cases and 32 MGCTB enrolled in the final research. Displayed the epidemiological characteristics, survival rate between primary MGCTB and secondary MGCTB, malignant transformation interval of MGCTB, imaging manifestations, pulmonary metastasis. Analyzed the surgical margin and the role of chemotherapy for MGCTB. Draw conclusions of high risk factor of GCTB transformation, adequate surgical margin reduce recurrence rates and effect of chemotherapy.

**PI Certification:**

I certify that the information provided above is accurate. I certify that I have received the appropriate training in the proper treatment of human participants in research. And I certify that all procedures described in this application are complete and accurate. All activities associated with this research project will be performed in accordance with Jishuitan Hospital Institutional Guidelines and Clinical Regulations. I agree to immediately report all unanticipated adverse affects of the study on subjects to the Chairperson of the Beijing Jishuitan Hospital Institutional Review Board.

**Signature of Principal Investigator:**  **Date:** Feb 28th 2018

**Chairperson, Beijing Jishuitan Hospital Institutional Review Board(print):** Xie-Yuan JIANG

**Signature:** 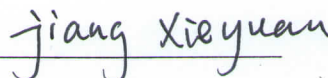 **Date:** March 12, 2018
